# Supplementary material for: Nature of visible-light responsive fluorinated titanium dioxides
Source: Royal Society of Chemistry journal article supplement (doi:10.1039/c3ta12506h), 2013-01-01
Supplement: c3ta12506h.pdf [file c3ta12506h.pdf]

## Supplementary Information

### Nature of visible-light responsive fluorinated titanium dioxides

Yun Wang,<sup>a</sup> Haimin Zhang,<sup>a</sup> Porun Liu,<sup>a</sup> Tao Sun,<sup>a</sup> Yibing Li,<sup>a</sup> Huagui Yang,<sup>a,b</sup> Xiangdong Yao,<sup>c</sup> Huijun Zhao<sup>\*a,d</sup>

<sup>a</sup> Centre for Clean Environment and Energy, and Griffith School of Environment, Griffith University, Gold Coast Campus, QLD 4222, Australia. E-mail: [h.zhao@griffith.edu.au](mailto:h.zhao@griffith.edu.au)

<sup>b</sup> Key Laboratory for Ultrafine Materials of Ministry of Education, School of Materials Science and Engineering, East China University of Science and Technology, 130 Meilong Road, Shanghai 200237, China

<sup>c</sup> QLD Micro- and Nanotechnology Centre, Griffith University, Nathan Campus, QLD 4111, Australia

<sup>d</sup> Key Laboratory of Materials Physics, Hefei Key Laboratory of Nanomaterials and Nanotechnology, Institutes of Solid State Physics, Chinese Academy of Sciences, Hefei 230031, China

\*Corresponding Author: Fax: +61-7-55528067; Tel: +61-7-55528261;

E-mail: [h.zhao@griffith.edu.au](mailto:h.zhao@griffith.edu.au)

### The atomic Coordinates and energies of F2c and F3c doped anatase TiO<sub>2</sub> (001) surfaces.

Unit cell box vectors:

```
3.819109300 0.000000000 0.000000000
0.000000000 3.819109300 0.000000000
0.000000000 0.000000000 26.733765103
```

Atomic coordinates of F2c doped surface ( $E_{tot} = -164.38\text{eV}$ ):

---

|    |          |          |           |
|----|----------|----------|-----------|
| Ti | 0.000000 | 2.882871 | 1.207509  |
| Ti | 1.909555 | 2.884527 | 3.634658  |
| Ti | 1.909555 | 0.974843 | 6.052195  |
| Ti | 0.000000 | 0.970408 | 8.507256  |
| Ti | 1.909555 | 0.968822 | 23.068289 |
| Ti | 0.000000 | 0.973148 | 25.523313 |
| F  | 0.000000 | 2.879780 | 8.490475  |
| F  | 1.909555 | 2.878284 | 23.081741 |
| F  | 0.000000 | 0.969088 | 10.295931 |
| F  | 1.909555 | 0.968130 | 21.279815 |
| O  | 0.000000 | 0.972558 | 0.788804  |
| O  | 1.909555 | 2.882185 | 1.629935  |
| O  | 0.000000 | 2.884314 | 3.212425  |
| O  | 1.909555 | 0.974133 | 4.053065  |
| O  | 1.909555 | 2.883373 | 5.639903  |
| O  | 0.000000 | 0.973198 | 6.460541  |
| O  | 1.909555 | 0.970991 | 8.097754  |
| O  | 0.000000 | 0.969365 | 23.477869 |
| O  | 1.909555 | 0.971835 | 25.114916 |
| O  | 0.000000 | 2.881820 | 25.935706 |

Atomic coordinates of F3c doped surface ( $E_{tot} = -162.69\text{ eV}$ ):

---

|    |          |          |           |
|----|----------|----------|-----------|
| Ti | 0.000000 | 2.885778 | 1.200371  |
| Ti | 1.909555 | 2.874517 | 3.641174  |
| Ti | 1.909555 | 0.954359 | 6.026532  |
| Ti | 0.000000 | 1.172771 | 8.777351  |
| Ti | 1.909555 | 0.775006 | 22.798274 |
| Ti | 0.000000 | 0.986786 | 25.548768 |

|   |          |          |           |
|---|----------|----------|-----------|
| F | 1.909555 | 0.973341 | 8.213912  |
| F | 0.000000 | 0.969385 | 23.362070 |
| F | 0.000000 | 1.016280 | 10.556214 |
| F | 1.909555 | 0.936256 | 21.020124 |
| O | 0.000000 | 0.975752 | 0.773513  |
| O | 1.909555 | 2.884397 | 1.632819  |
| O | 0.000000 | 2.875100 | 3.208803  |
| O | 1.909555 | 0.964864 | 4.068013  |
| O | 1.909555 | 2.875049 | 5.625009  |
| O | 0.000000 | 0.980115 | 6.492691  |
| O | 0.000000 | 2.915962 | 8.600571  |
| O | 1.909555 | 2.850557 | 22.973514 |
| O | 1.909555 | 0.962476 | 25.082253 |
| O | 0.000000 | 2.884921 | 25.950128 |
